# Supplementary material
Source: publisher figshare collection journal article supplement (https://springernature.figshare.com/ndownloader/files/18735104)

**Figure S2. A) Power as a function of effect size: comparison of the variable**

**threshold (VT) approach used in our study and SKAT-O.** We used *BMPR2* data from 1832 unrelated European PAH Biobank cases and 5,262 unrelated European internal controls for the analysis. In total, there are 188 rare variants ( $AF < 10^{-4}$  and variant type likely gene damaging or missense). Under each condition, we randomly label cases and controls with a required fraction ( $F$ ) of true cases being labeled as cases. Since the effect size (relative risk) of *BMPR2* is fixed in the original data,  $F$  determines the effect size in each condition.  $F = 0.258$  is equivalent to completely randomizing cases and controls labels and therefore, it corresponds to the null model (relative risk=1).  $F=1$  corresponds to original case/control data and maximizes the effect size (relative risk ~45). The power was estimated using two significance thresholds,  $\alpha=0.005$  and  $\alpha=2.5E-06$ . 1000 simulations were run in each setting. Better power can be observed for VT compared to SKAT-O across a fraction range of 0.4-0.6, reflecting a range of modest effect sizes (relative risk ~ 2 to 5).

**B) Power as a function of cumulative allele frequency (CAF): comparison of the variable threshold (VT) approach used in our study and SKAT-O.** In this comparison, we aim to show the power for genes with different size. Given a sample size and effect size, cumulative allele frequency is determined largely by gene transcript size. We used the same *BMPR2* data set as Figure 1. Given an effect size (fixed by fraction of true cases / simulated cases, as the x-axis in figure 1), we randomly sample a fraction of genotypes from the original data to reach smaller CAF than *BMPR2*, and performed 1000 simulations for power analysis. The power was estimated using a single significance threshold ( $\alpha=2.5E-06$ ). The larger the CAF, the greater the power for each effect size. We observed better power of VT compared to SKAT-O under all conditions. Similar results were obtained using a threshold of  $\alpha=0.005$  (data not shown).

A.

 $\alpha = 0.005$ 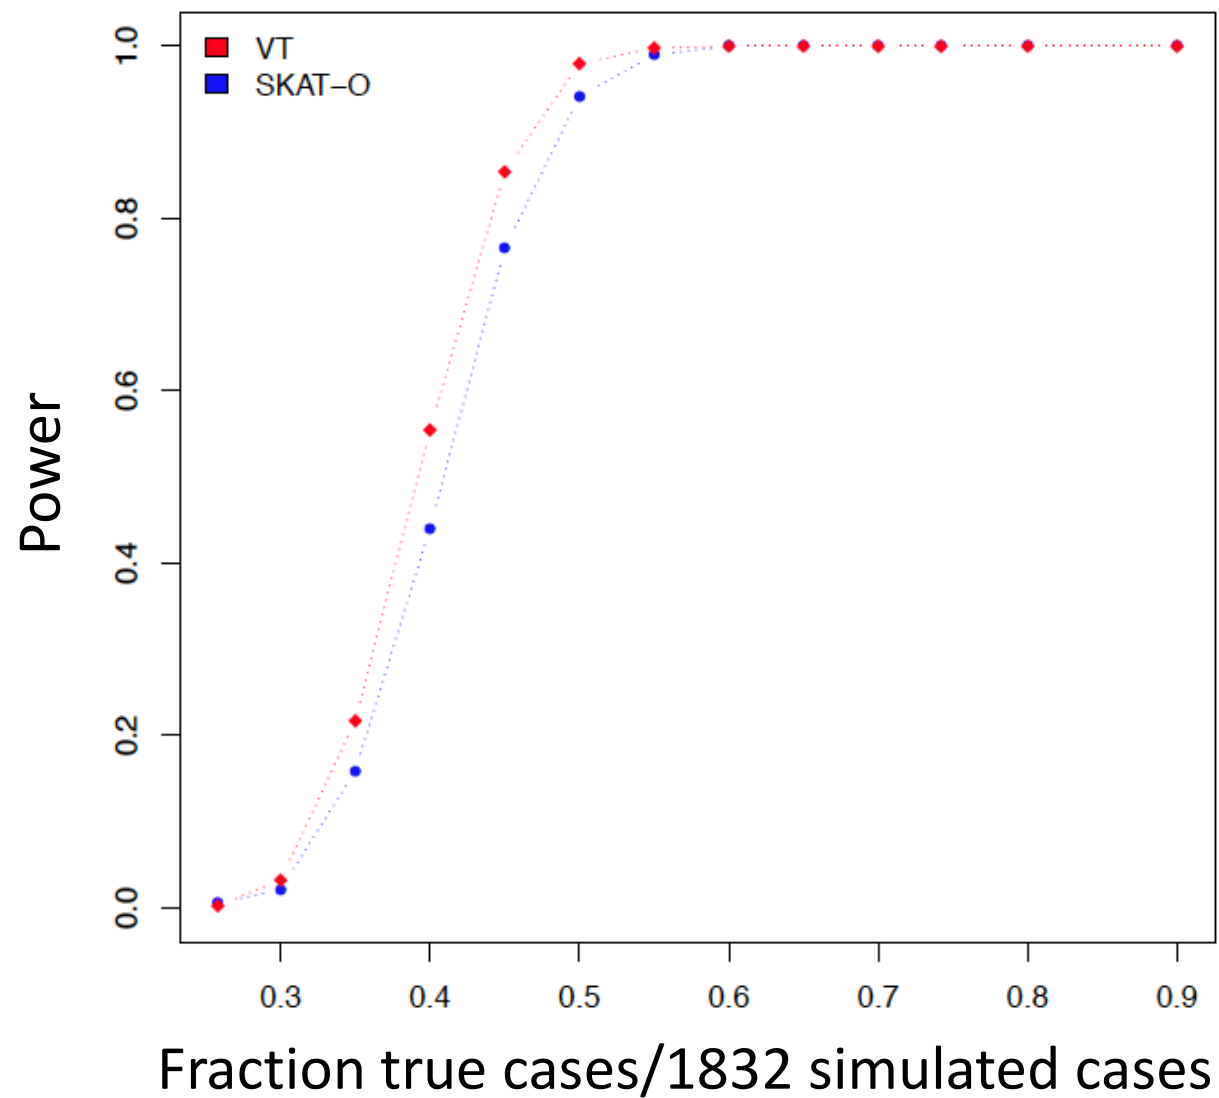 $\alpha = 2.5E-06$ 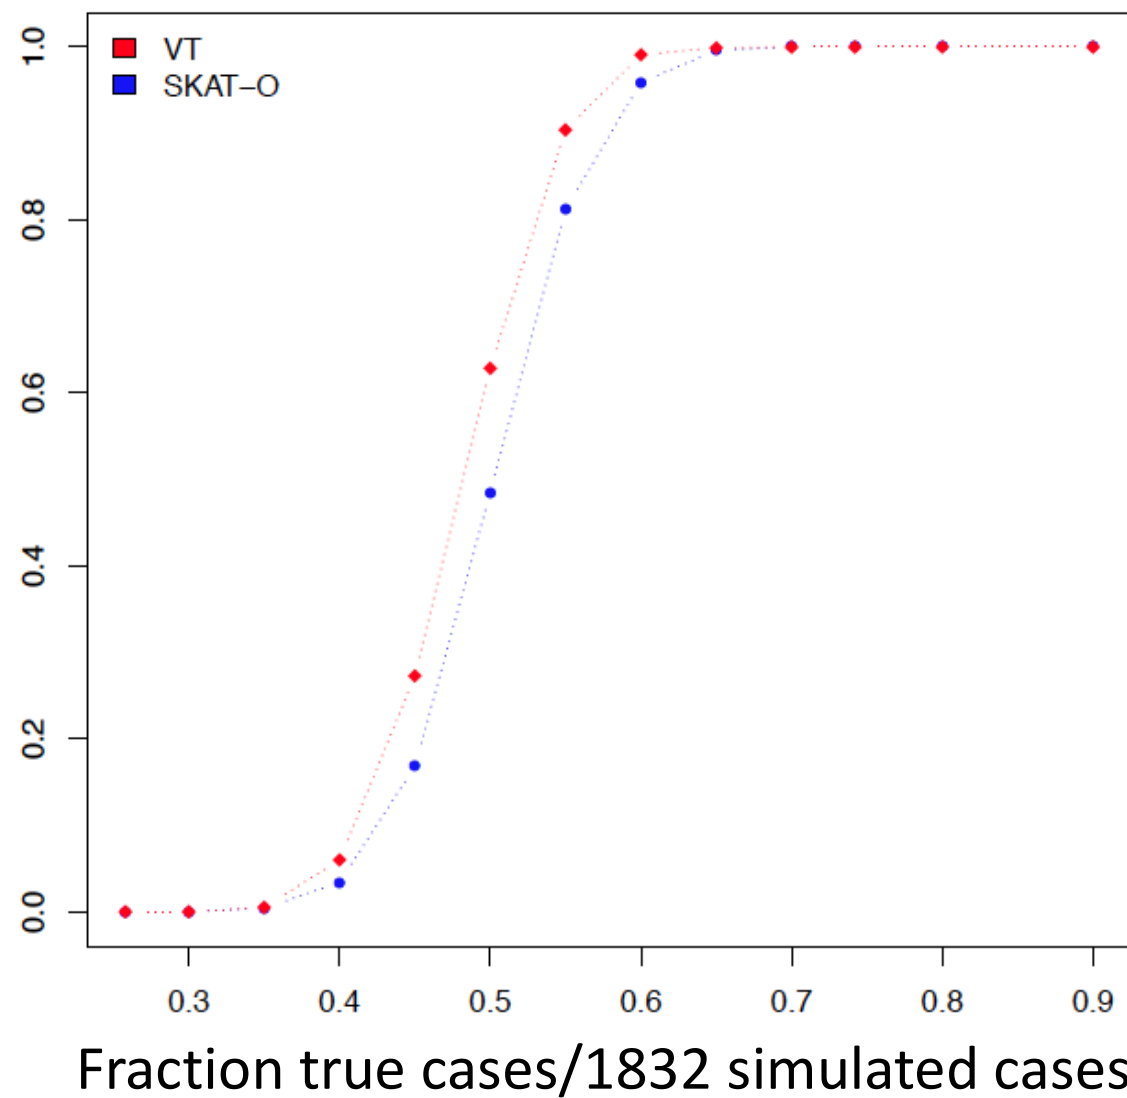

B.

Fraction true cases/simulated cases = 0.6

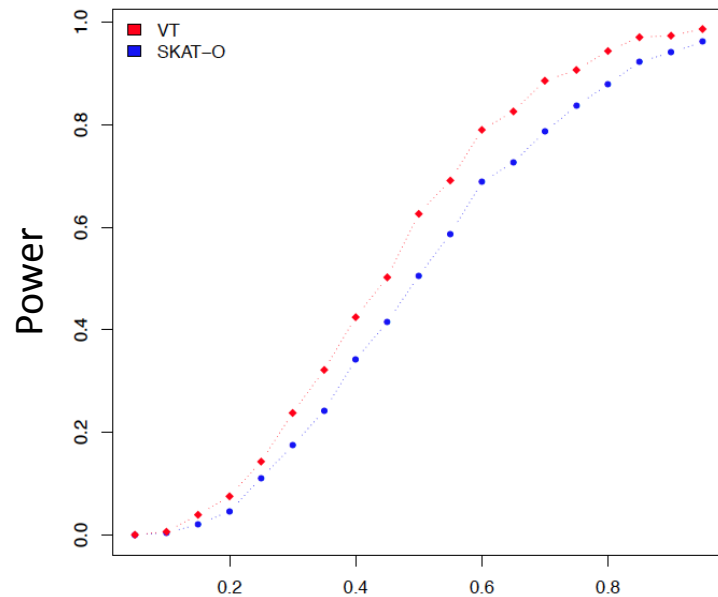

Fraction true cases/simulated cases = 0.55

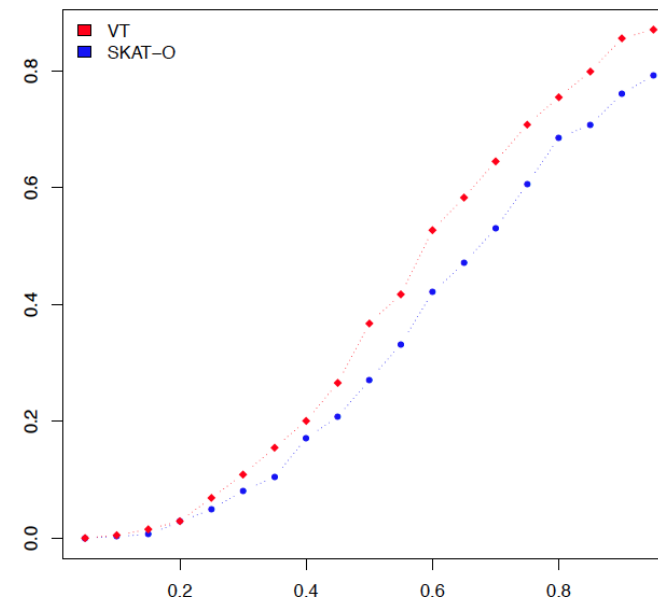

Fraction true cases/simulated cases = 0.50

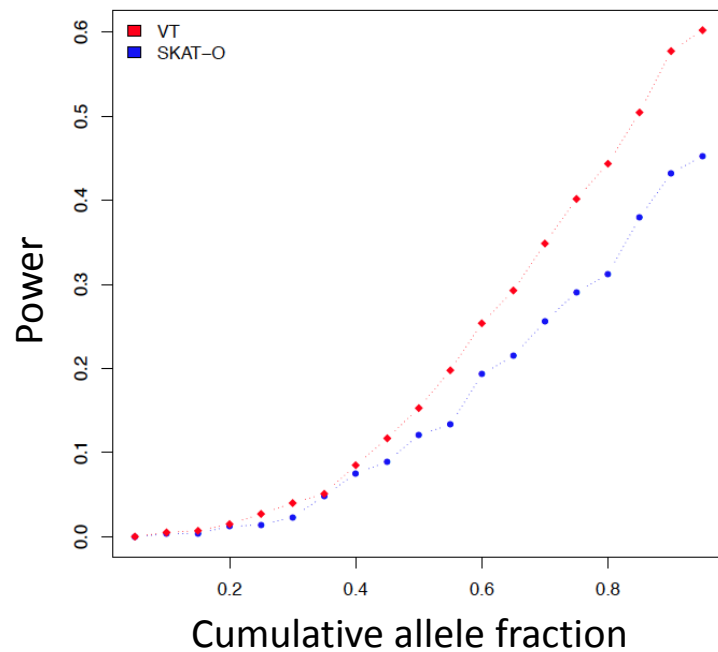

Fraction true cases/simulated cases = 0.45

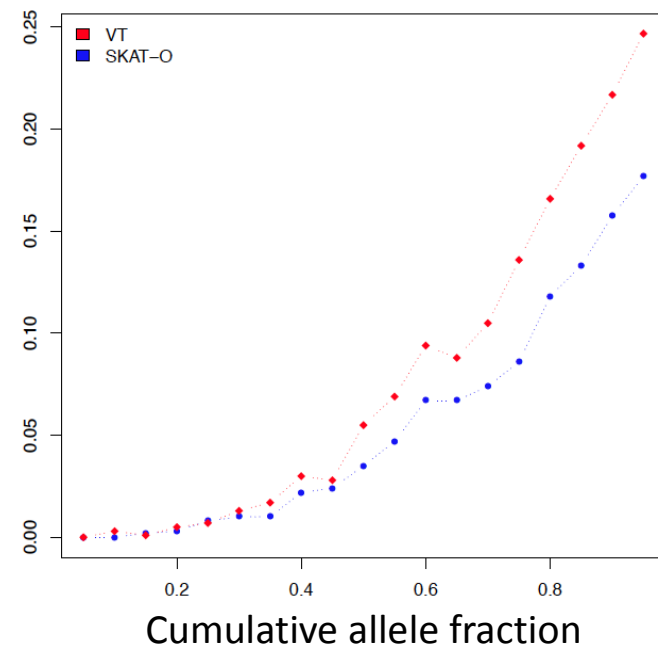

Supplement: Supplementary file [file 18735104]
